# Supplementary material
Source: PubMed Central journal article supplement (PMC10127997)
Supplement: mbio.00220-23-s0001.pdf [file mbio.00220-23-s0001.pdf]

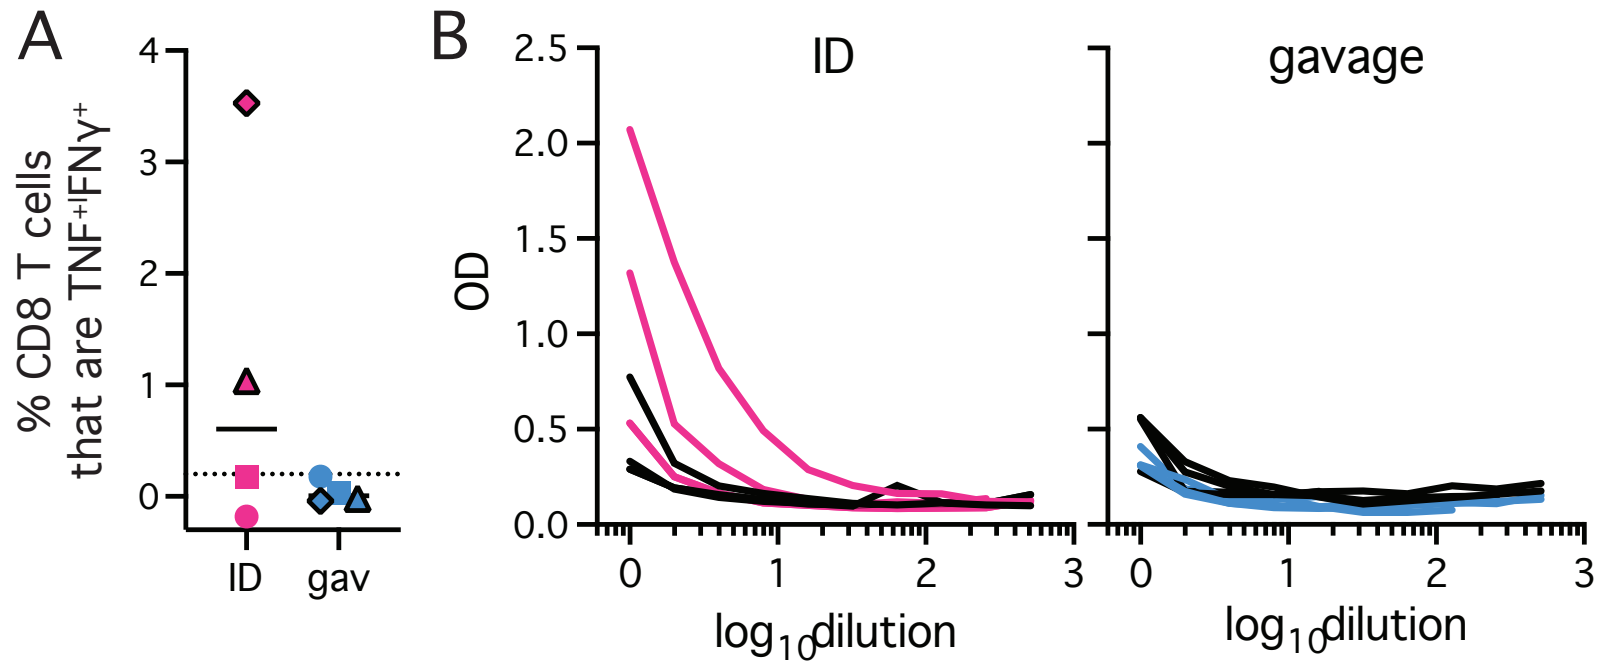

Supplemental Figure 1. Mtb-specific CD8 T cell and IgG responses in the BAL. (A) BAL cells from week 10 post-infection were restimulated with MTB300 and the frequency of IFN $\gamma$ +TNF+ CD8 T cells were measured by intracellular cytokine staining. (B) Mtb-lysate specific IgG responses in the BAL fluid were measured at baseline (black lines) and week 10 (ID: magenta and gavage: blue lines).
